# Supplementary material for: A resistance-driven H2 gas sensor: high-entropy alloy nanoparticles decorated 2D MoS2
Source: Royal Society of Chemistry journal article supplement (doi:10.1039/d3nr04810a), 2023-01-01
Supplement: d3nr04810a1.pdf [file d3nr04810a1.pdf]

## Supporting Information

### **Resistance Driven H<sub>2</sub> Gas Sensor: High Entropy Alloy Nanoparticles decorated 2D MoS<sub>2</sub>**

Bidesh Mondal<sup>1</sup>, Xiaolei Zhang<sup>2</sup>, Sumit Kumar<sup>3</sup>, Feng Long<sup>2,4</sup>, Nirmal Kumar Katiyar<sup>5</sup>, Mahesh Kumar<sup>\*3</sup>, Saurav Goel<sup>\*5,6</sup> and Krishanu Biswas<sup>1\*</sup>

<sup>1</sup> *Department of Materials Science and Engineering, Indian Institute of Technology Kanpur, Kanpur, India, 208016*

<sup>2</sup> *Department of Chemical and Process Engineering, University of Strathclyde, Glasgow, UK*

<sup>3</sup> *Department of Electrical Engineering, Indian Institute of Technology Jodhpur, India*

<sup>4</sup> *Institute of Chemical Industry of Forest Products, Chinese Academy of Forestry, Nanjing 210042, China*

<sup>5</sup> *School of Engineering, London South Bank University, London UK, SE1 0AA*

<sup>6</sup> *University of Petroleum and Energy Studies, Dehradun 248007, India*

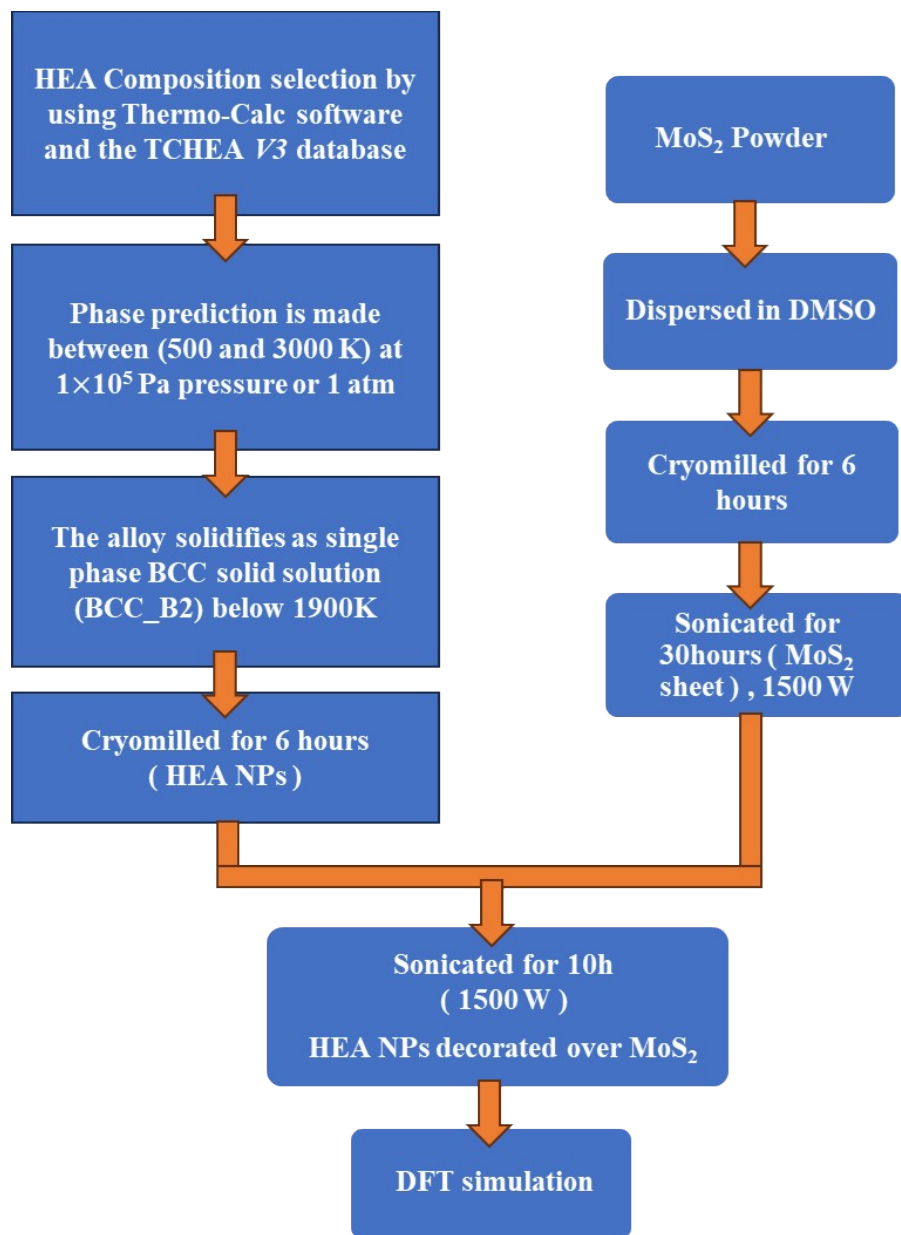

**Fig. S1** Materials design process and its accompanying consistent experimental methodology

Equilibrium fractions of the phases present in 1 mole of  $\text{Ti}_{20}\text{Zr}_{20}\text{V}_{20}\text{Nb}_{20}\text{Hf}_{20}$  HEA system were estimated using Thermo-Calc software and the TCHEA V3 database. The phase prediction is made between (500 and 3000 K) at 1 atm. The alloy solidifies as BCC solid solution (BCC\_B2) below 1900 K, as presented in Figure S2, and is stable down to 900K.

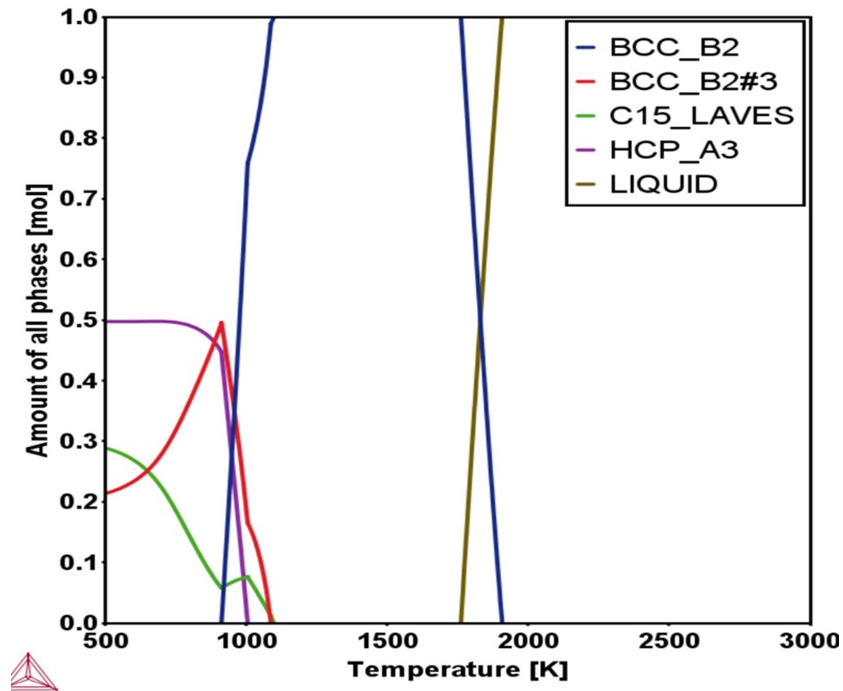

**Fig. S2** Equilibrium phase fraction of the  $\text{Ti}_{20}\text{Zr}_{20}\text{V}_{20}\text{Nb}_{20}\text{Hf}_{20}$  HEA as a function of temperature calculated using the TCHEA3 database.

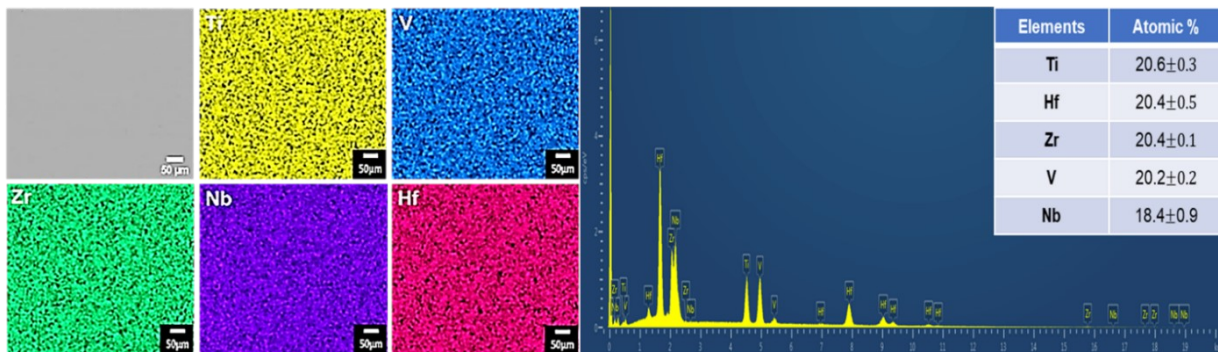

**Fig. S3** Backscattered SEM micrograph and EDS mapping of homogenized  $\text{Ti}_{20}\text{Zr}_{20}\text{V}_{20}\text{Nb}_{20}\text{Hf}_{20}$  alloy.

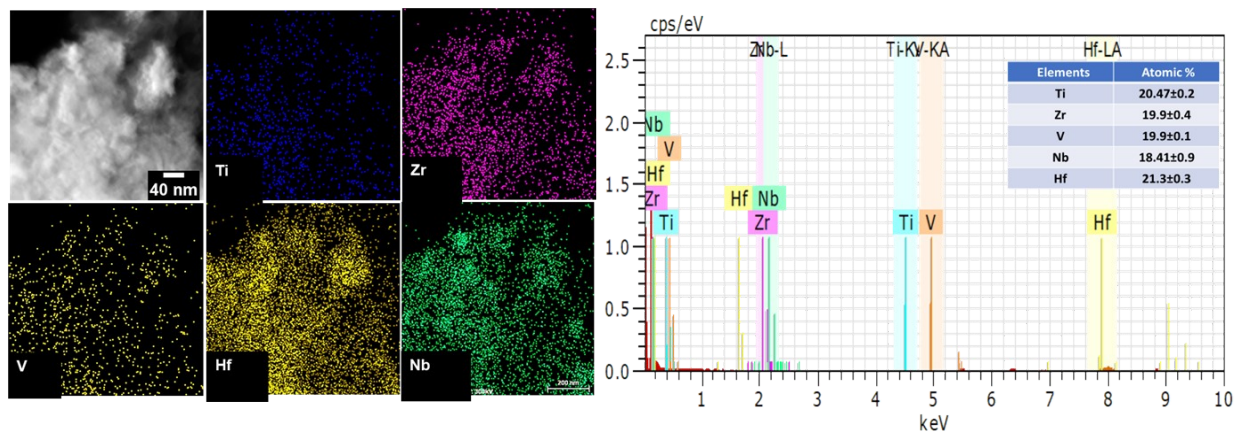

Fig. S4 EDS and Elemental mapping of HEA NPs.

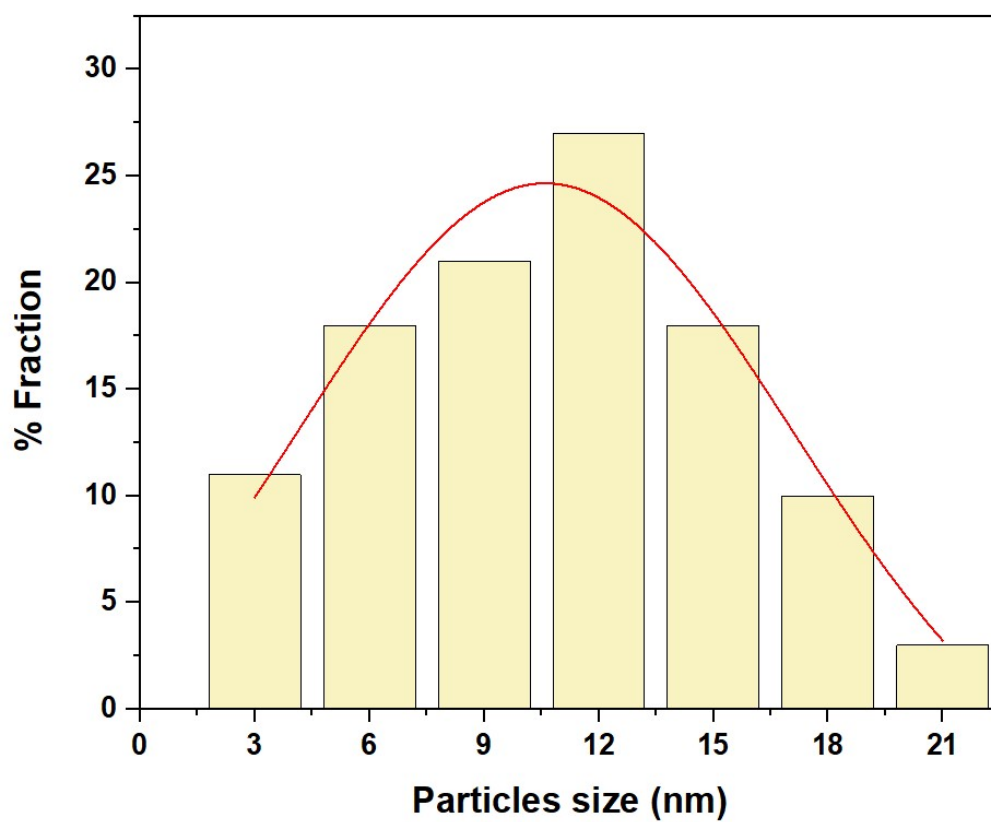

Fig.S5 Particle size distribution of HEA nanoparticles using TEM.
